# Supplementary material
Source: ML conference proceedings conference paper supplement (https://proceedings.mlr.press/v119/ding20c.html)
Supplement: Supplementary file [file ding20c-supp.pdf]

---

# Supplement: Layered Sampling for Robust Optimization Problems

---

Hu Ding<sup>1</sup> Zixiu Wang<sup>1</sup>

## 1. Experiments

For both Algorithm 1 and 2, we need to compute an initial solution  $\tilde{C}$  or  $\tilde{h}$  first. For  $k$ -median/means clustering, we run the algorithm of Local Search with Outliers from (Gupta et al., 2017) on a small sample of size  $O(k)$  to obtain the  $k$  initial centers. We do not directly use the  $k$ -means++ method (Arthur & Vassilvitskii, 2007) to seed the  $k$  initial centers because it is sensitive to outliers. For linear regression, we run the standard linear regression algorithm on a small random sample of size  $O(z)$  to compute an initial solution.

**Different coresets methods** Each of the following methods returns a weighted set as the coreset, and then we run the alternating minimization algorithm  $k$ -means-- (Chawla & Gionis, 2013) (or (Shen & Sanghavi, 2019) for linear regression) on it to obtain the solution. For fairness, we keep the coresets from different methods to have the same coreset size for each instance.

- Layered Sampling (LaySam). *i.e.*, Algorithm 1 and 2 proposed in this paper.
- Uniform Sampling (UniSam). The most natural and simple method is to take a sample  $S$  uniformly at random from the input data set  $P$ , where each sampled point has the weight  $|P|/|S|$ .
- Uniform Sampling + Nearest Neighbor Weight (NN) (Gupta et al., 2017; Chen et al., 2018). Similar to UniSam, we also take a random sample  $S$  from the input data set  $P$ . For each  $p \in P$ , we assign it to its nearest neighbor in  $S$ ; for each  $q \in S$ , we set its weight to be the number of points assigned to it.
- Summary (Chen et al., 2018). It is a method to construct the coreset for  $k$ -median/means clustering with outliers by successively sampling and removing points

---

<sup>1</sup>School of Computer Science and Technology, University of Science and Technology of China. Correspondence to: Hu Ding <huding@ustc.edu.cn, <http://staff.ustc.edu.cn/~huding/>>.

from the original data until the number of the remaining points is small enough.

The above LaySam, UniSam and NN are also used for linear regression in our experiments. We run 10 trials for each case and take the average. All the experimental results were obtained on a Ubuntu server with 2.4GHz E5-2680V4 and 256GB main memory; the algorithms were implemented in Matlab R2018b.

**Performance Measures** The following measures will be taken into account in the experiment.

- $\ell_1$ -loss:  $\mathcal{K}_1^{-z}$  or  $\mathcal{LR}_1^{-z}$ .
- $\ell_2$ -loss:  $\mathcal{K}_2^{-z}$  or  $\mathcal{LR}_2^{-z}$ .
- recall/precision. Let  $O^*$  and  $O$  be the sets of outliers with respect to the optimal solution and our obtained solution, respectively.  $\text{recall} = \frac{|O \cap O^*|}{|O^*|}$  and  $\text{precision} = \frac{|O \cap O^*|}{|O|}$ . Since  $|O^*| = |O| = z$ ,  $\text{recall} = \text{precision} = \frac{|O \cap O^*|}{z}$ .
- pre-recall. It indicates the proportion of  $O^*$  that are included in the coreset. Let  $S$  be the coreset and  $\text{pre-recall} = \frac{|S \cap O^*|}{|O^*|}$ . We pay attention in particular to this measure, because the outliers could be quite important and may reveal some useful information (*e.g.*, anomaly detection). For example, as for clustering, if we do not have any prior knowledge of a given biological data, the outliers could be from an unknown tiny species. Consequently it is more preferable to keep such information when compressing the data. More detailed discussion on the significance of outliers can be found in (Beyer & Sendhoff, 2007; Zimek et al., 2012).

**Datasets** We consider the following datasets in our experiments.

- syncluster We generate the synthetic data as follows: Firstly we create  $k$  centers with each dimension randomly located in  $[0, 100]$ . Then we generate the points following standard Gaussian distributions around the centers.

- `synregression` Firstly, we randomly set the  $d$  coefficients of hyperplane  $h$  in  $[-5, +5]$  and construct  $\mathbf{x}_i$  in  $[0, 10]^{d-1}$  by uniform sampling. Then let  $y_i$  be the inner product of  $(\mathbf{x}_i, 1)$  and  $h$ . Finally we randomly perturb each  $y_i$  by  $\mathcal{N}(0, 1)$ .
- `3DSpatial` ( $n = 434874, d = 4$ ). This dataset was constructed by adding the elevation information to a 2D road network in North Jutland, Denmark (Kaul et al., 2013).
- `covertype` ( $n = 581012, d = 10$ ). It is a forest cover type dataset from Jock A. Blackard (UCI Machine Learning Repository), and we select its first 10 attributes.
- `skin` ( $n = 245057, d = 3$ ). The skin dataset is collected by randomly sampling B, G, R values from face images of various age groups and we select its first three dimension (Bhatt & Dhall).
- `SGEMM` ( $n = 241600, d = 15$ ). It contains the running times for multiplying two  $2048 \times 2048$  matrices using a GPU OpenCL SGEMM kernel with varying parameters (Ballester-Ripoll et al., 2017).
- `PM2.5` ( $n = 41757, d = 11$ ). It is a data set containing the PM2.5 data of US Embassy in Beijing (Liang et al., 2015).

For each dataset, we randomly pick  $z$  points to be outliers by perturbing their locations in each dimension. We use a parameter  $\sigma$  to measure the extent of perturbation. For example, we consider the Gaussian distribution  $\mathcal{N}(0, \sigma)$  and uniform distribution  $[-\sigma, +\sigma]$ . So the larger the parameter  $\sigma$  is, the more diffused the outliers will be. For simplicity, we use the notations in the form of [dataset]-[distribution]- $\sigma$  to indicate the datasets, e.g., `syncluster-gauss- $\sigma$` .

### 1.1. Coreset Construction Time

We fix the coreset size and vary the data size  $n$  of the synthetic datasets, and show the coreset construction times in Figure 1(a) and 1(b). It is easy to see that the construction time of NN is larger than other construction times by several orders of magnitude. It is not out of expectation that UniSam is the fastest (because it does not need any operation except uniform random sampling). Our LaySam lies in between UniSam and Summary.

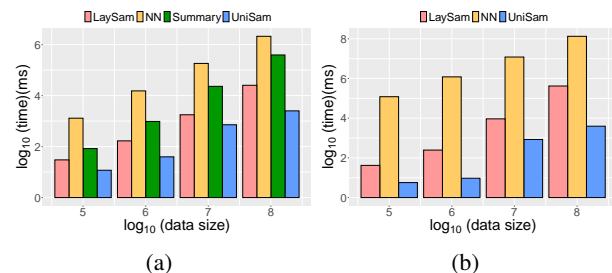

Figure 1. Coreset construction time w.r.t. data size. (a) Clustering: coreset size= $10^4$ ,  $d = 5$  and  $k = 10$ ; (b) Linear Regression: coreset size= $10^4$  and  $d = 20$ .

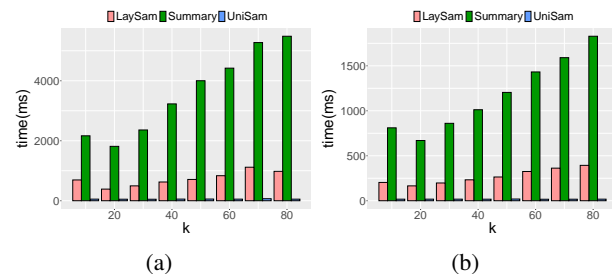

Figure 2. Construction time w.r.t.  $k$ . (a) `syncluster` with data size  $n = 10^6$ ,  $d = 20$ ; (b) `covertype`.

We also study the influence of  $k$  (for clustering) on the construction time by testing the synthetic datasets and the real-world dataset `covertype` (see Figure 2(a) and 2(b)).

### 1.2. Performance

Figure 3(a)-3(e) show the performances of clustering on  $\ell_2$ -loss with different  $\sigma$ s. The results on  $\ell_1$ -loss are very similar (more results are summarized in Table 1 and 2). We can see that LaySam outperforms the other methods in terms of both synthetic and real-world datasets. Moreover, its performance remains quite stable (with small standard deviation) and is also robust when  $\sigma$  increases. UniSam works well when  $\sigma$  is small, but it becomes very instable when  $\sigma$  rises to large. Both LaySam and UniSam outperform Summary on most datasets.

Similar comparison of the performance for linear regression are shown in Figure 4(a)-4(c).

The three coreset methods achieve very close values of recall and precision. But UniSam has much lower pre-recall than those of Summary and LaySam.

### References

Arthur, D. and Vassilvitskii, S. K-means++: The advantages of careful seeding. In *Proceedings of the Eighteenth*

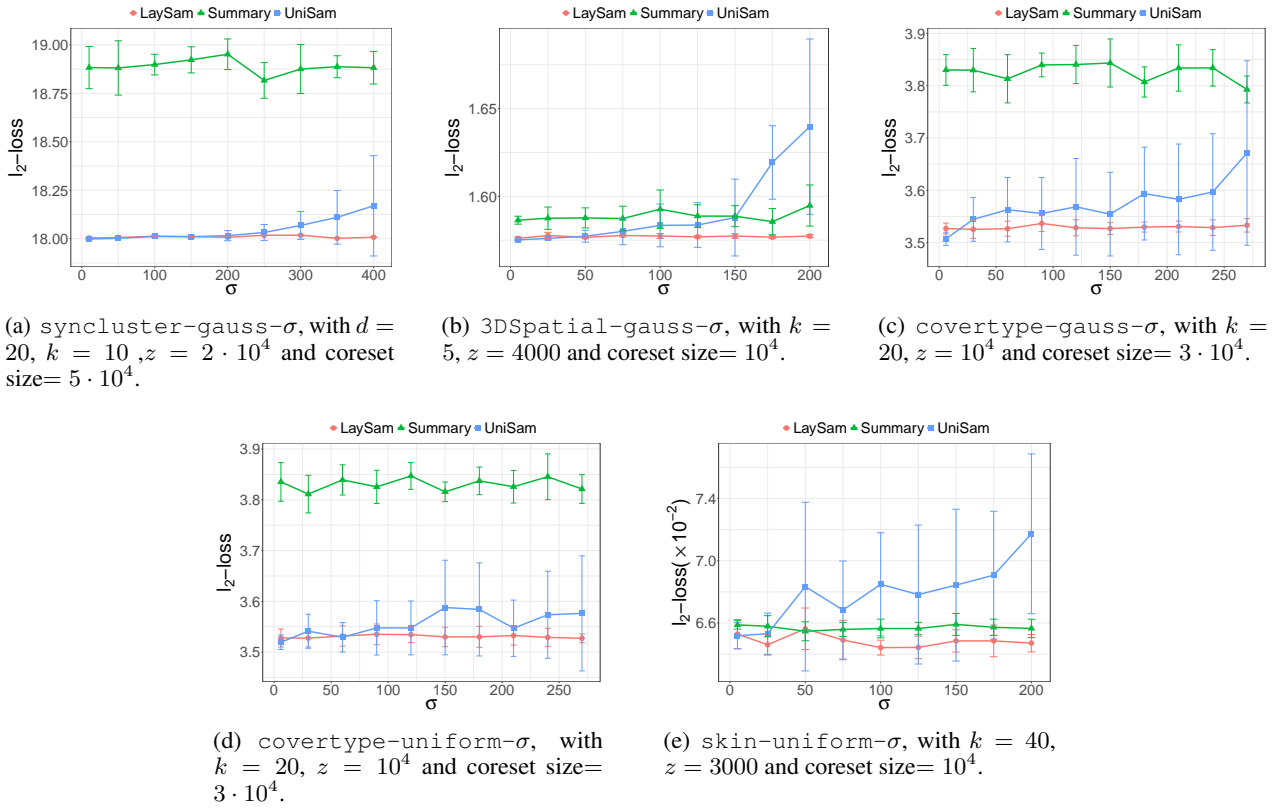

Figure 3. Clustering:  $\ell_2$ -loss and stability w.r.t.  $\sigma$ .

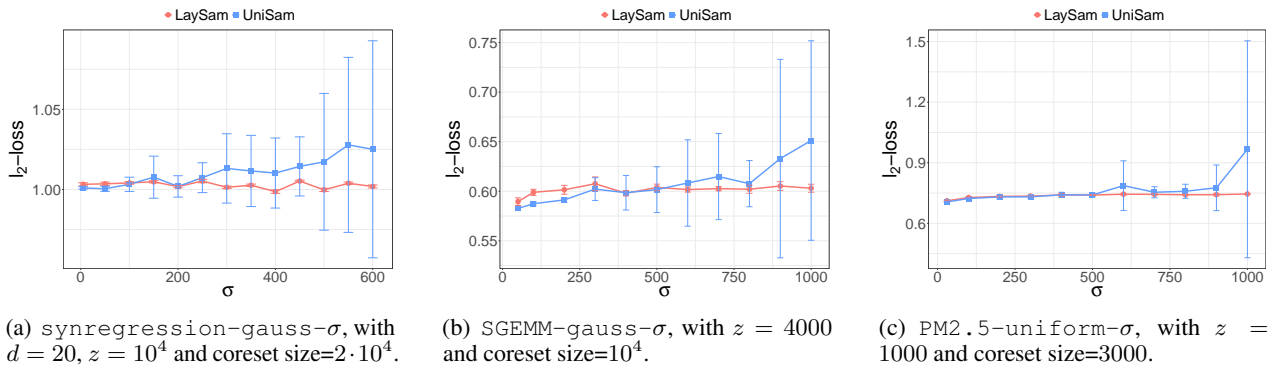

Figure 4. Linear Regression:  $\ell_2$ -loss and stability w.r.t.  $\sigma$ .

**Supplement: Layered Sampling for Robust Optimization Problems**

---

(a) `syncluster-gauss- $\sigma$` , with  $d = 20$ ,  $k = 10$ ,  $z = 2 \cdot 10^4$  and coreset size =  $5 \cdot 10^4$ .

| $\sigma$       | 20     |        |         | 100    |        |         | 200    |        |         |
|----------------|--------|--------|---------|--------|--------|---------|--------|--------|---------|
| Coreset        | LaySam | UniSam | Summary | LaySam | UniSam | Summary | LaySam | UniSam | Summary |
| $\ell_1$ -loss | 3.976  | 3.976  | 4.073   | 3.976  | 3.976  | 4.067   | 3.977  | 4.048  | 4.074   |
| $\ell_2$ -loss | 18.01  | 18     | 18.9    | 18.01  | 18.01  | 18.84   | 18.01  | 18.14  | 18.91   |
| Prec           | 1      | 1      | 1       | 1      | 1      | 1       | 1      | 1      | 1       |
| Pre-Rec        | 1      | 0.0506 | 1       | 1      | 0.0499 | 1       | 1      | 0.0503 | 1       |

(b) `covertyp-gauss- $\sigma$` , with  $k = 20$ ,  $z = 10^4$  and coreset size =  $3 \cdot 10^4$ .

| $\sigma$       | 20     |        |         | 100    |        |         | 200    |        |         |
|----------------|--------|--------|---------|--------|--------|---------|--------|--------|---------|
| Coreset        | LaySam | UniSam | Summary | LaySam | UniSam | Summary | LaySam | UniSam | Summary |
| $\ell_1$ -loss | 1.781  | 1.781  | 1.868   | 1.779  | 1.785  | 1.871   | 1.786  | 1.799  | 1.853   |
| $\ell_2$ -loss | 3.501  | 3.501  | 3.818   | 3.505  | 3.523  | 3.874   | 3.515  | 3.576  | 3.767   |
| Prec           | 1      | 1      | 1       | 1      | 1      | 1       | 1      | 1      | 1       |
| Pre-Rec        | 1      | 0.0524 | 1       | 1      | 0.0511 | 1       | 1      | 0.0547 | 1       |

(c) `skin-uniform- $\sigma$` , with  $k = 40$ ,  $z = 3000$  and coreset size =  $10^4$ .

| $\sigma$                           | 20     |        |         | 100    |        |         | 200    |        |         |
|------------------------------------|--------|--------|---------|--------|--------|---------|--------|--------|---------|
| Coreset                            | LaySam | UniSam | Summary | LaySam | UniSam | Summary | LaySam | UniSam | Summary |
| $\ell_1$ -loss                     | 0.1906 | 0.1906 | 0.1925  | 0.1883 | 0.1902 | 0.1914  | 0.1954 | 0.2032 | 0.1957  |
| $\ell_2$ -loss( $\times 10^{-2}$ ) | 6.46   | 6.531  | 6.579   | 6.449  | 6.849  | 6.565   | 6.471  | 7.173  | 6.565   |
| Prec                               | 0.9993 | 0.9995 | 0.9993  | 1      | 1      | 1       | 1      | 1      | 1       |
| Pre-Rec                            | 0.9997 | 0.0403 | 1       | 1      | 0.0403 | 1       | 1      | 0.0437 | 1       |

Table 1. Performance on clustering with outliers.

(a) `synregression-gauss- $\sigma$` , with  $d = 20$ ,  $z = 10^4$  and coreset size =  $2 \cdot 10^4$ .

| $\sigma$       | 20     |        | 300    |        | 600    |        |
|----------------|--------|--------|--------|--------|--------|--------|
| Coreset        | LaySam | UniSam | LaySam | UniSam | LaySam | UniSam |
| $\ell_1$ -loss | 0.7996 | 0.7982 | 0.7989 | 0.8007 | 0.7987 | 0.7998 |
| $\ell_2$ -loss | 1.003  | 0.9993 | 1.001  | 1.01   | 1.002  | 1.025  |
| Prec           | 0.9305 | 0.931  | 0.9953 | 0.9953 | 0.9975 | 0.9978 |
| Pre-Rec        | 0.9535 | 0.0108 | 0.9968 | 0.0093 | 0.9975 | 0.0098 |

(b) `PM2.5-uniform- $\sigma$` , with  $z = 1000$  and coreset size = 3000.

| $\sigma$       | 20     |        | 500    |        | 1000   |        |
|----------------|--------|--------|--------|--------|--------|--------|
| Coreset        | LaySam | UniSam | LaySam | UniSam | LaySam | UniSam |
| $\ell_1$ -loss | 0.6292 | 0.6244 | 0.637  | 0.6368 | 0.6349 | 0.6791 |
| $\ell_2$ -loss | 0.7179 | 0.7075 | 0.744  | 0.7473 | 0.7456 | 0.8819 |
| Prec           | 0.9188 | 0.921  | 0.99   | 0.9901 | 0.9918 | 0.9917 |
| Pre-Rec        | 0.9714 | 0.0732 | 0.999  | 0.0725 | 1      | 0.0734 |

Table 2. Performance on linear regression with outliers.

- Annual ACM-SIAM Symposium on Discrete Algorithms, SODA '07*, pp. 1027–1035, Philadelphia, PA, USA, 2007. Society for Industrial and Applied Mathematics. ISBN 978-0-898716-24-5.
- Ballester-Ripoll, R., Paredes, E. G., and Pajarola, R. Sobol tensor trains for global sensitivity analysis. *CoRR*, abs/1712.00233, 2017.
- Beyer, H.-G. and Sendhoff, B. Robust optimization—a comprehensive survey. *Computer methods in applied mechanics and engineering*, 196(33-34):3190–3218, 2007.
- Bhatt, R. and Dhall, A. Skin segmentation dataset. *UCI Machine Learning Repository*.
- Chawla, S. and Gionis, A. k-means--: A unified approach to clustering and outlier detection. In *SDM*, 2013.
- Chen, J., Azer, E. S., and Zhang, Q. A practical algorithm for distributed clustering and outlier detection. In *Advances in Neural Information Processing Systems 31: Annual Conference on Neural Information Processing Systems 2018, NeurIPS 2018, 3-8 December 2018, Montréal, Canada*, pp. 2253–2262, 2018.
- Gupta, S., Kumar, R., Lu, K., Moseley, B., and Vassilvitskii, S. Local search methods for k-means with outliers. *Proc. VLDB Endow.*, 10(7):757–768, March 2017. ISSN 2150-8097. doi: 10.14778/3067421.3067425.
- Kaul, M., Yang, B., and Jensen, C. Building accurate 3d spatial networks to enable next generation intelligent transportation systems. volume 1, 06 2013. doi: 10.1109/MDM.2013.24.
- Liang, X., Zou, T., Guo, B., Li, S., Zhang, H., Zhang, S., Huang, H., and Chen, S. Assessing beijing’s pm 2.5 pollution: severity, weather impact, apec and winter heating. *Proceedings of the Royal Society A: Mathematical, Physical and Engineering Science*, 471:20150257, 10 2015. doi: 10.1098/rspa.2015.0257.
- Shen, Y. and Sanghavi, S. Iterative least trimmed squares for mixed linear regression. In *Advances in Neural Information Processing Systems 32: Annual Conference on Neural Information Processing Systems 2019, NeurIPS 2019, 8-14 December 2019, Vancouver, BC, Canada*, pp. 6076–6086, 2019.
- Zimek, A., Schubert, E., and Kriegel, H.-P. A survey on unsupervised outlier detection in high-dimensional numerical data. *Statistical Analysis and Data Mining: The ASA Data Science Journal*, 5(5):363–387, 2012.
